# Supplementary material for: Genome-Enabled Insights into the Ecophysiology of the Comammox Bacterium “Candidatus Nitrospira nitrosa”
Source: PubMed Central journal article supplement (PMC5596200; doi:10.1128/msystems.00059-17), 2017-09-12

100

Ammonia-oxidizing archaea

Comammox Clade A

Comammox Clade B

Uncultured bacterium clone 9 682 5 (DQ008369)  
*Ca. Nitrospira nitrificans* (CZPZ01000000)  
 Uncultured bacterium clone B7233-77 (AJ564440)  
 Uncultured Crenothrix sp. clone AW-a (DQ984193)  
*Nitrospira* sp. CG24\_B  
*Nitrospira* sp. Ga0074138 (LNDU00000000)  
 Uncultured bacterium Clone PS.N.2 (AB222896)  
 Uncultured methanotrophic bacterium clone 454-Crenothrix (KP218998)  
*Ca. Nitrospira inopinata* (NZ LN885086)  
 WWTP a Lieshout clone 4 (JF706214)  
***Nitrospira* sp. UW-LDO-01**  
*Ca. Nitrospira nitrosa* (CZQA01000000) amoA1  
*Ca. Nitrospira nitrosa* (CZQA01000000) amoA2  
 Uncultured methanotrophic bacterium clone V133 (KC844913)  
 Uncultured bacterium clone S3A-113 (AJ515373)  
*Nitrospira* sp. CG24\_A  
 Uncultured bacterium clone WP1AD9 (FN395327)  
 Uncultured bacterium clone Mid HT 62 56 1 2 30 (FJ529752)  
 Uncultured bacterium isolate DGGE band KM1b-e (AJ868245)  
 Uncultured bacterium WP1AD10 (FN395328)  
*Nitrospira* sp. CG24\_C  
*Nitrospira* sp. CG24\_E

87  
***Nitrosospira* lineage**

*Nitrosomonas communis* strain Nm2 (NZ CP011451)  
*Nitrosomonas nitrosa* (FOUF01000000)  
*Nitrosomonas halophila* strain Nm1 (FNOY01000000)  
*Nitrosomonas europaea* ATCC 19718 (AL954744)  
*Nitrosomonas* sp. TK794 (AB031869)  
*Nitrosomonas eutropha* C91, (NC 008344)  
*Nitrosomonas* sp. GH22 (AF327917)  
*Nitrosomonas cryotolerans* (AF314753)  
*Nitrosomonas aestuarii* strain Nm69 (FOSP00000000)  
*Nitrosomonas* sp. JL21 (AF327919)  
**D100 - Contig 13731/222-1045**  
*Nitrosomonas oligotropha* strain Nm75 (FNOE01000000)  
*Nitrosomonas* sp. IS79A3 (CP002876)  
*Nitrosomonas* sp. AL212 (AF327918)  
*Nitrosomonas ureae* strain Nm10 (CP013341)

55  
 pmoA  
***Nitrosococcus* lineage**

100

51

82

100

81

31

72

100

92

100

100

71

63

50

36

56

39

58

71

91

72

58

96

100

100

55

100

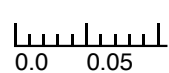

Supplement: sys005172133sf4.pdf [file sys005172133sf4.pdf]
