# Supplementary material for: Genome-Enabled Insights into the Ecophysiology of the Comammox Bacterium “Candidatus Nitrospira nitrosa”
Source: PubMed Central journal article supplement (PMC5596200; doi:10.1128/msystems.00059-17), 2017-09-12

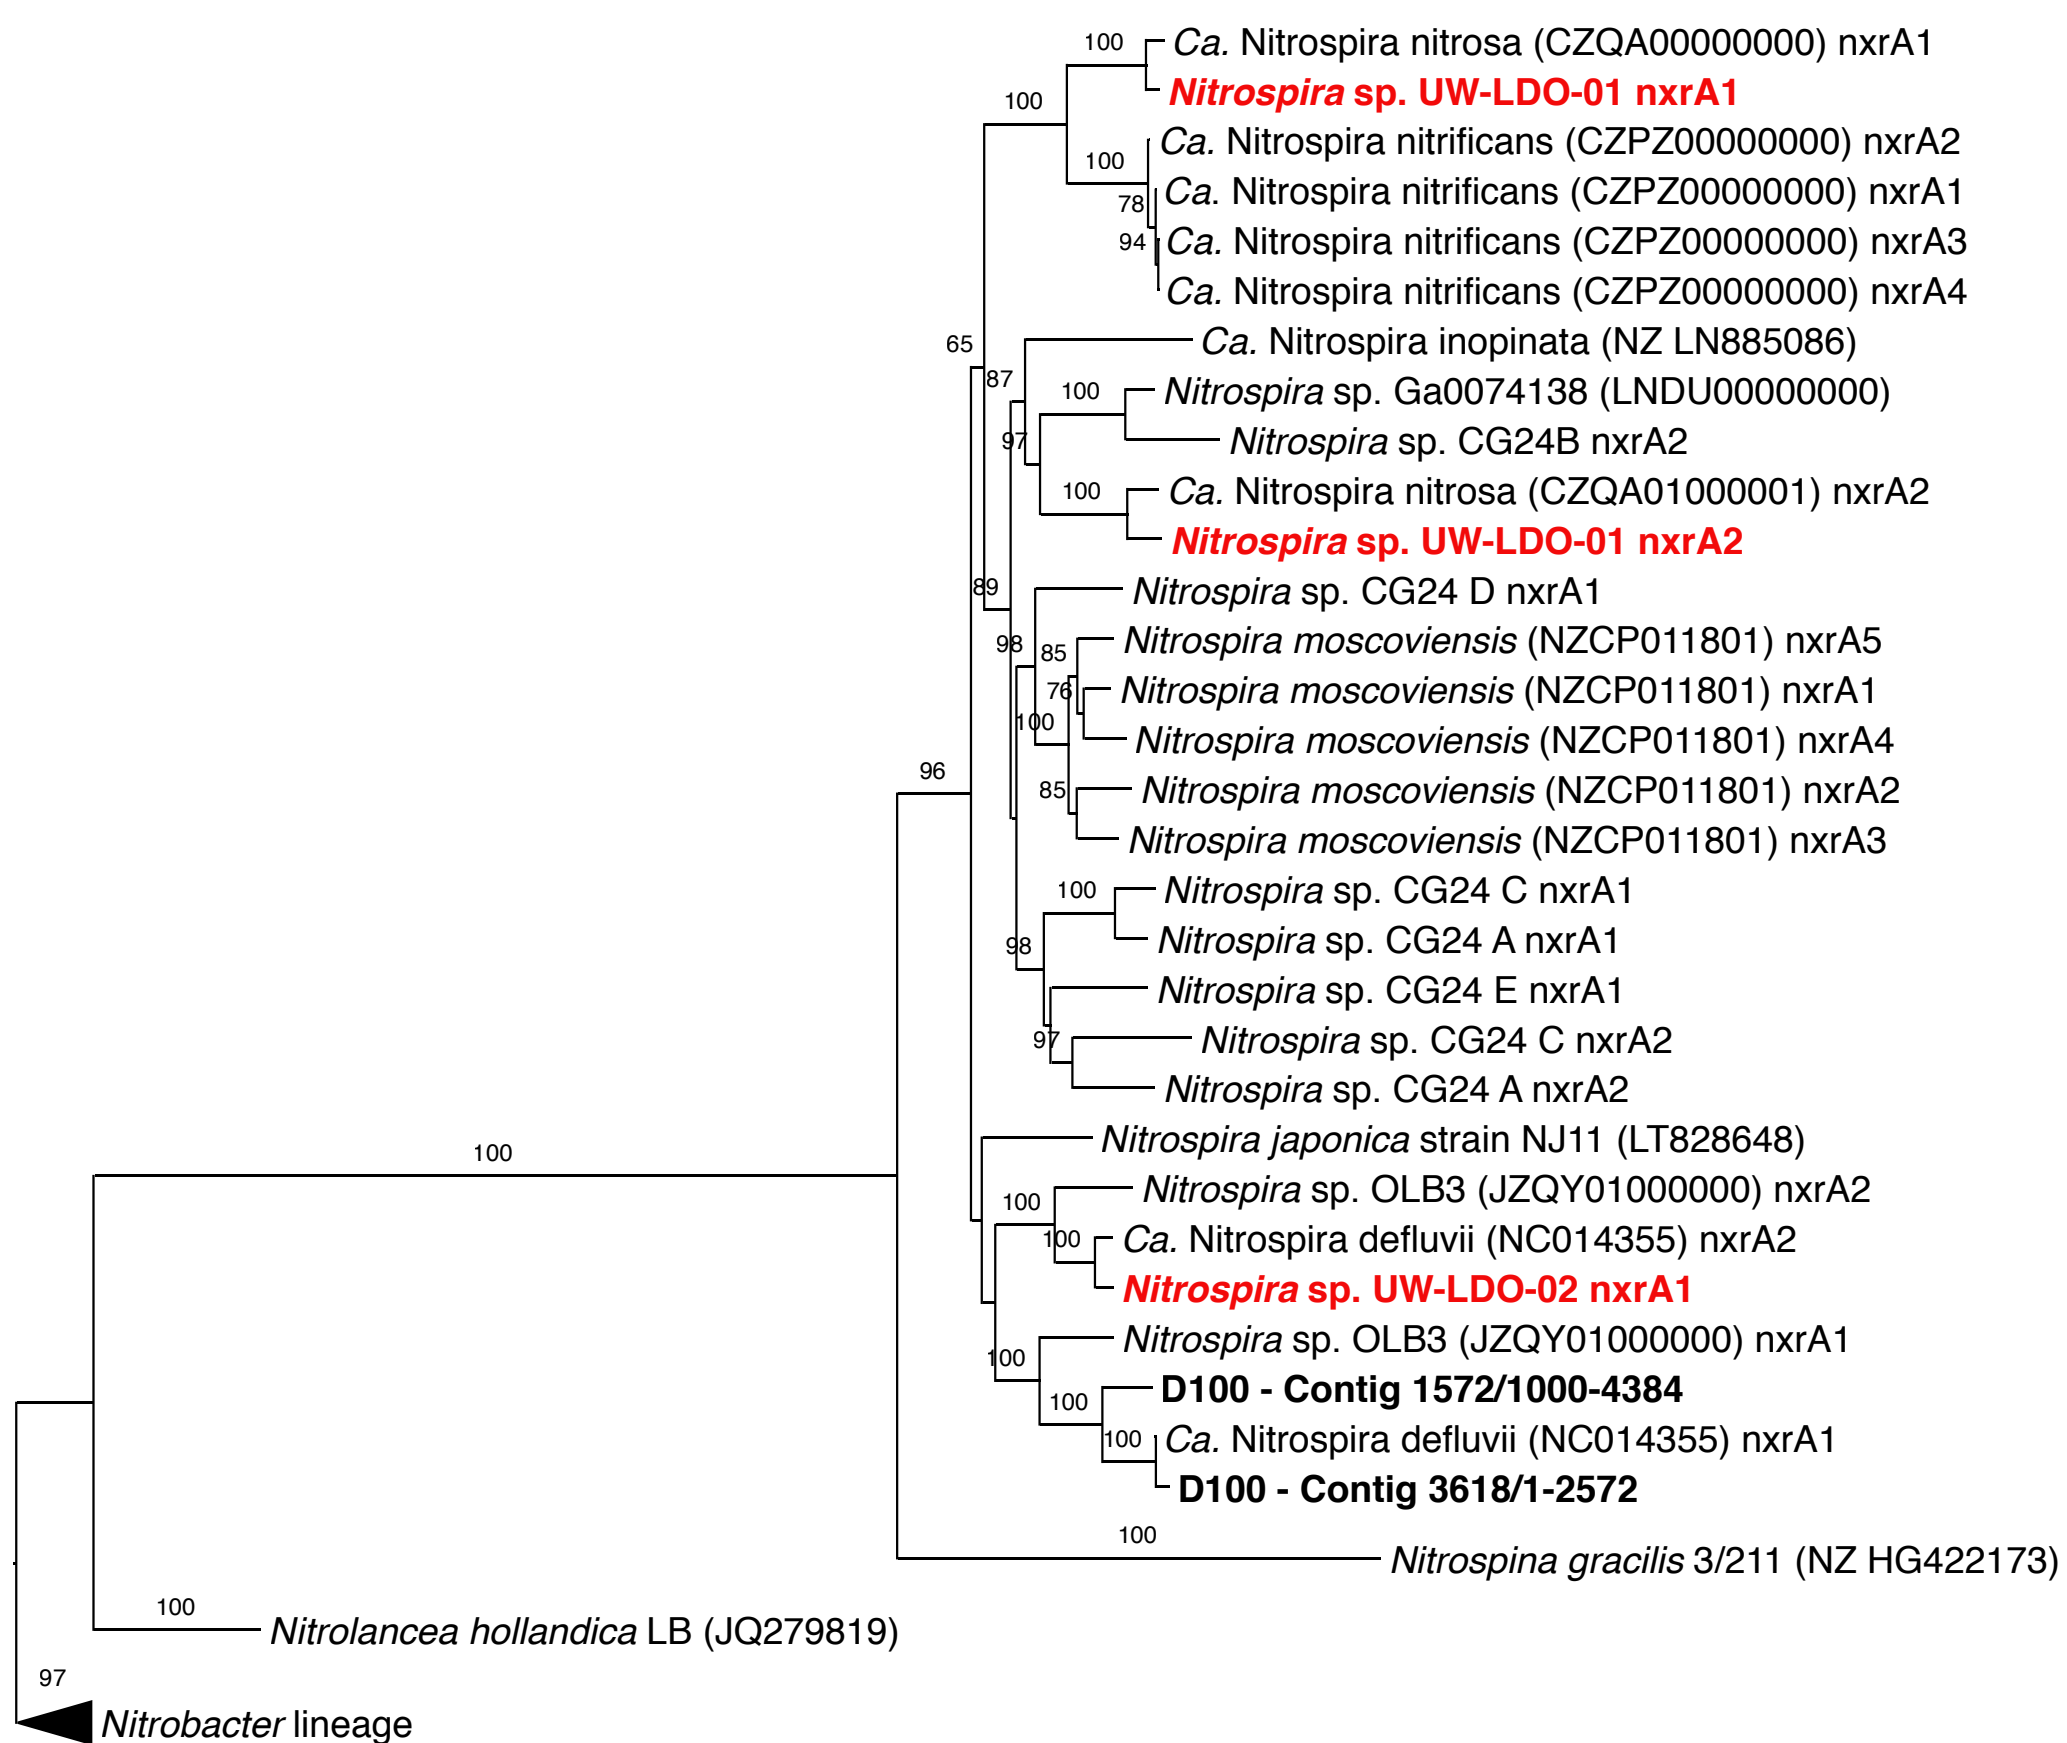

Supplement: sys005172133sf6.pdf [file sys005172133sf6.pdf]
