# Supplementary material for: Genome-Enabled Insights into the Ecophysiology of the Comammox Bacterium “Candidatus Nitrospira nitrosa”
Source: PubMed Central journal article supplement (PMC5596200; doi:10.1128/msystems.00059-17), 2017-09-12
Supplement: sys005172133sf7.pdf [file sys005172133sf7.pdf]

**A**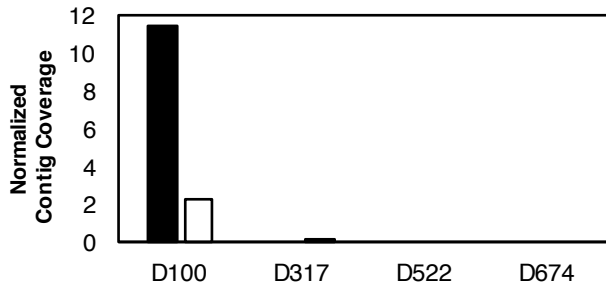

■ *Nitrospira* sp. UW-LDO-01  
 □ D100 - Contig 13731/222-1045

**B**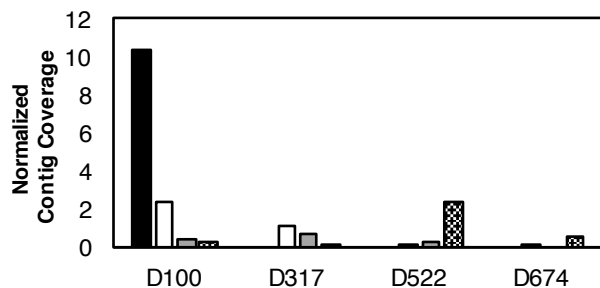

■ *Nitrospira* sp. UW-LDO-01  
 □ D100 - Contig 12845/145-1031  
 ▒ D522 - Contig 159583/1-828  
 ▣ D522 - Contig 20964/1587-3289

**C**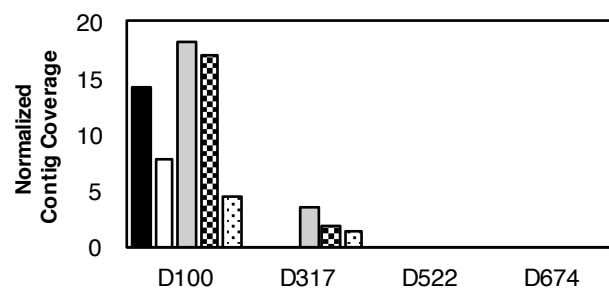

■ *Nitrospira* sp. UW-LDO-01 nxrA1  
 □ *Nitrospira* sp. UW-LDO-01 nxrA2  
 ▒ *Nitrospira* sp. UW-LDO-02 nxrA1  
 ▣ D100 - Contig 1572/1000-4384  
 ▤ D100 - Contig 3618/1-2572
